# Supplementary material
Source: publisher figshare collection journal article supplement (https://acs.figshare.com/ndownloader/files/5691996)
Supplement: Supplementary file 1 [file 5691996]

## Supporting Information

# Adsorption of Xyloglucan onto Cellulose Surfaces of Different Morphologies: An Entropy-Driven Process

**Tobias Benselfelt,<sup>\*,†</sup> Emily D. Cranston,<sup>‡</sup> Sedat Ondaral,<sup>§</sup> Erik Johansson,<sup>||</sup> Harry Brumer,<sup>⊥</sup> Mark W. Rutland,<sup>#</sup> and Lars Wågberg<sup>\*,†</sup>**

<sup>†</sup>Department of Fibre and Polymer Technology and Wallenberg Wood Science Center, KTH Royal Institute of Technology, 100 44 Stockholm, Sweden

<sup>‡</sup>Department of Chemical Engineering, McMaster University, Hamilton, Ontario L8S 4L7, Canada

<sup>§</sup>Department of Pulp and Paper Technology, Karadeniz Technical University, 61080 Trabzon, Turkey

<sup>||</sup>Cellutech AB, 114 28 Stockholm, Sweden

<sup>⊥</sup>The Michael Smith Laboratories and the Department of Chemistry, The University of British Columbia, Vancouver, British Columbia V6T 1Z4, Canada

<sup>#</sup>Surface and Corrosion Science, KTH Royal Institute of Technology, 100 44 Stockholm, Sweden

## Corresponding Authors

\*E-mail: wagberg@kth.se.

\*E-mail: bense@kth.se.

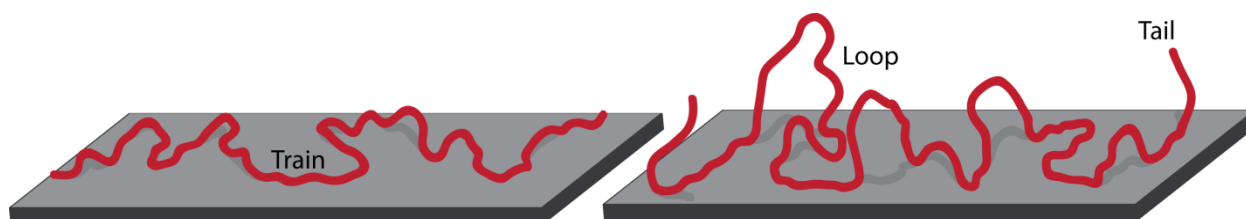

**Figure S1.** Polymers at an interface illustrating the train, loop, and tail configurations.

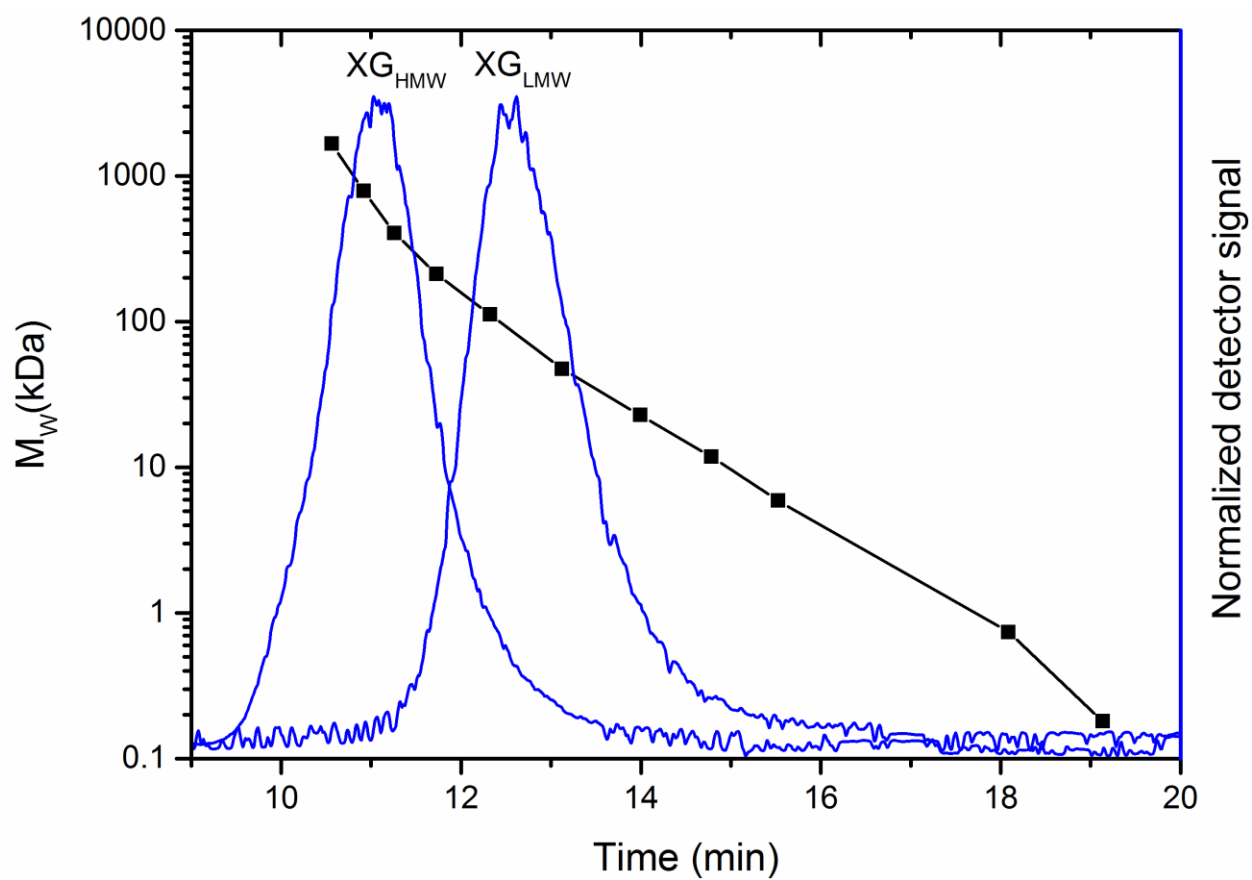

**Figure S2.** Calibration curve with pullulan standards in the range 180 to 1660000 Da and the normalized detector signals from the GPC.

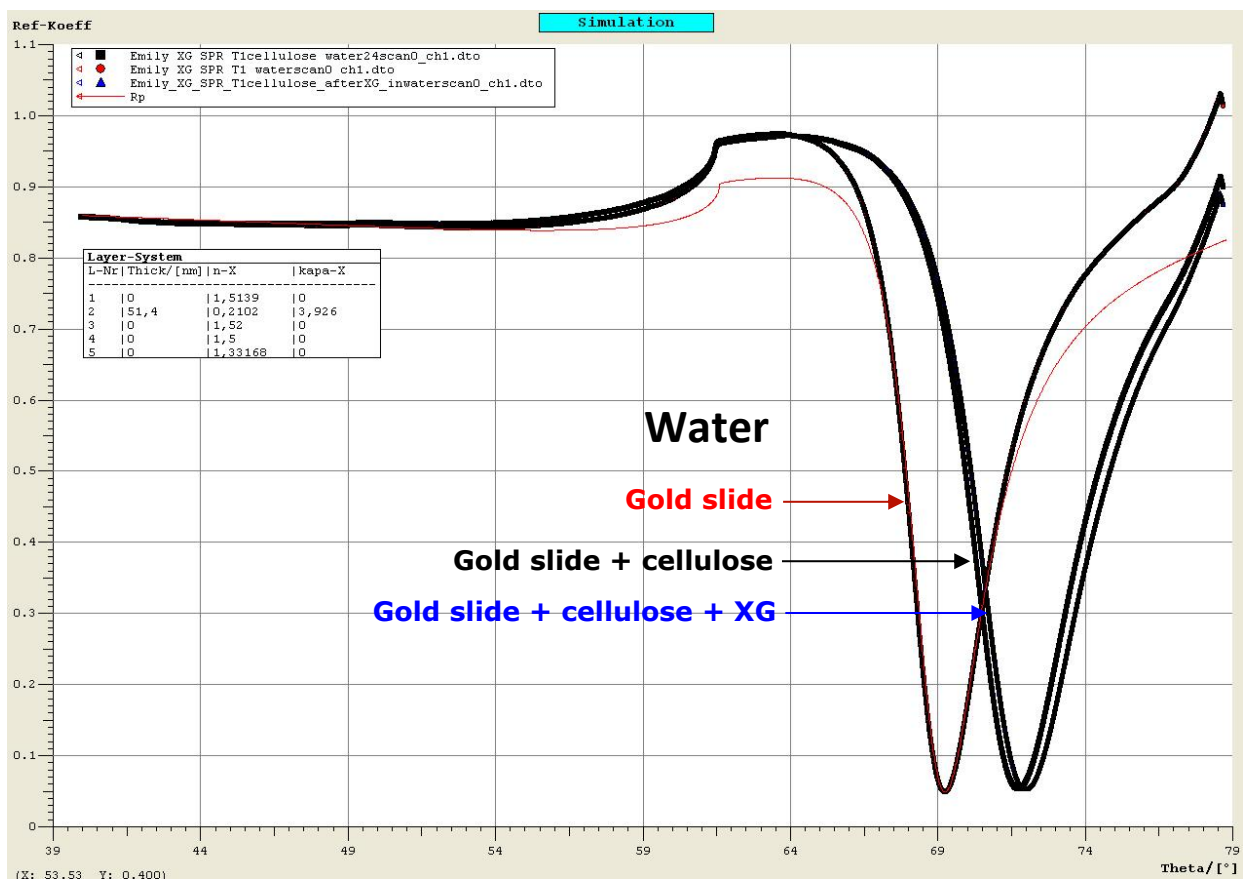

**Figure S3.** Example SPR ‘full angular scans’ in water for a Au substrate, with a spin-coated NMMO cellulose film on Au, and after XG was allowed to adsorb for 200 minutes (50 mg/L, pH  $7 \pm 1$ , flow rate 100  $\mu\text{L}/\text{min}$  at 24°C). Fit (in red) for the Au-Cr layer on BK7 glass is shown and the other fitting parameters are described in Table S1. The ‘best fit’ came from a least-squares fitting routine that fits the curve minimum in the x-axis (i.e. the SPR angle) and converges at 0.01%. The intensity (y-axis) at the SPR angle varied due to surface roughness and film/substrate uniformity.

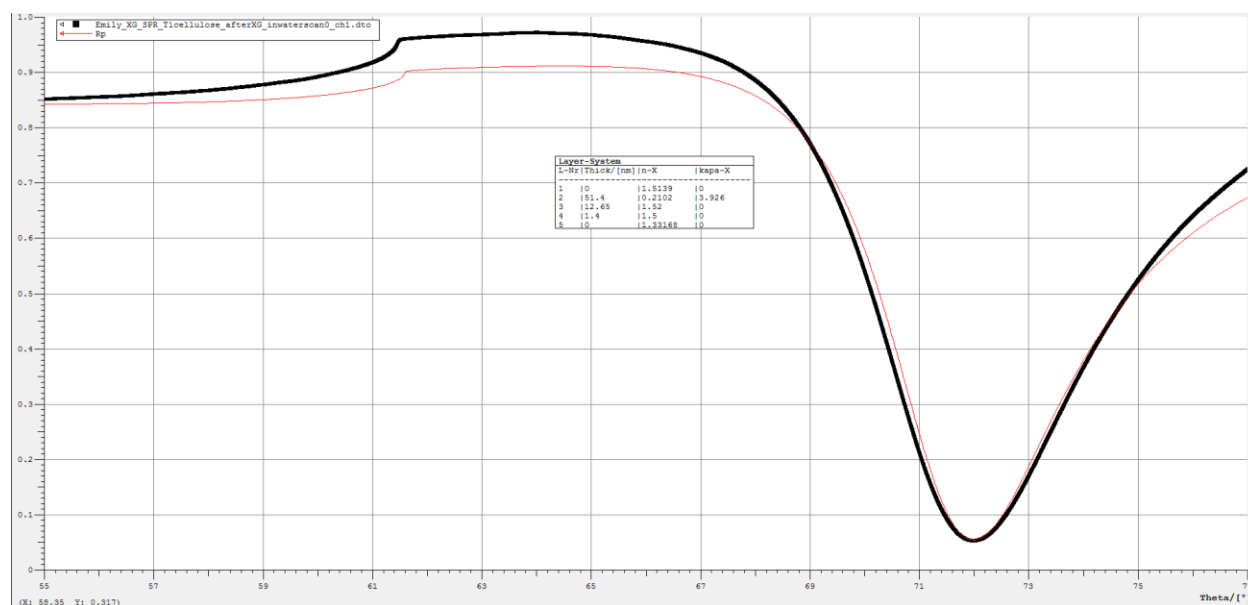

**Figure S4.** Fit for SPR curve of XG Adsorption on NMMO-Regenerated Cellulose in Water at 24°C. Black is experimental data and red is simulated curve. Iterative fitting routine converges at 0.01% leading to peak angle matching to the third decimal place.

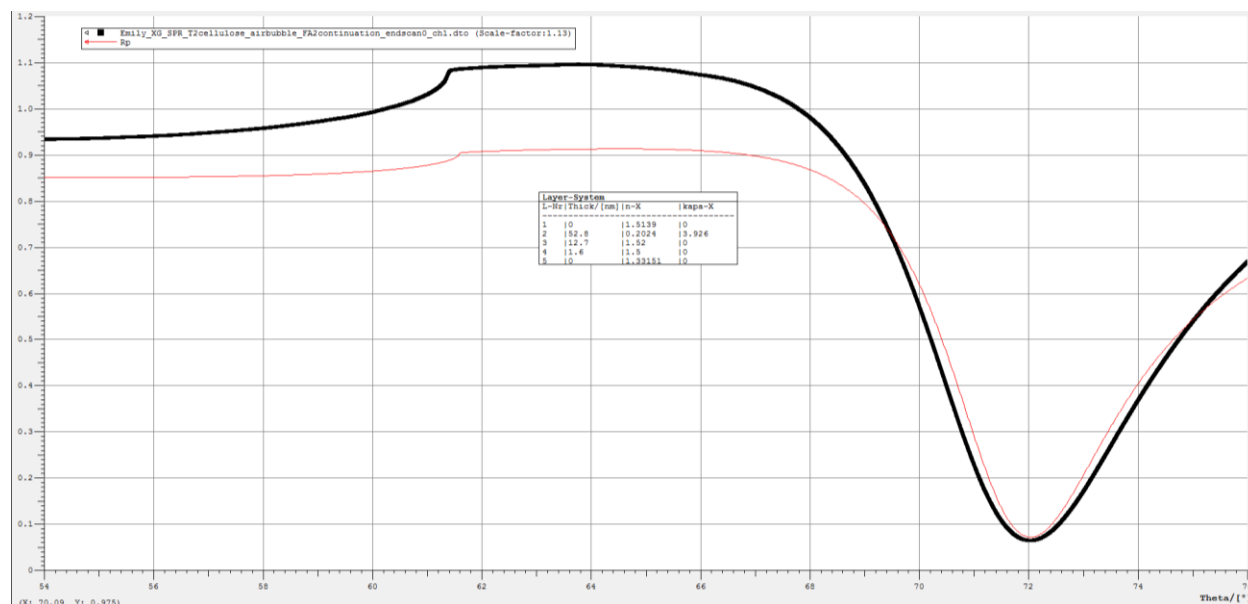

**Figure S5.** Fit for SPR curve of XG Adsorption on NMMO-Regenerated Cellulose in Water at 32°C. Black is experimental data and red is simulated curve. Iterative fitting routine converges at 0.01% leading to peak angle matching to the third decimal place.

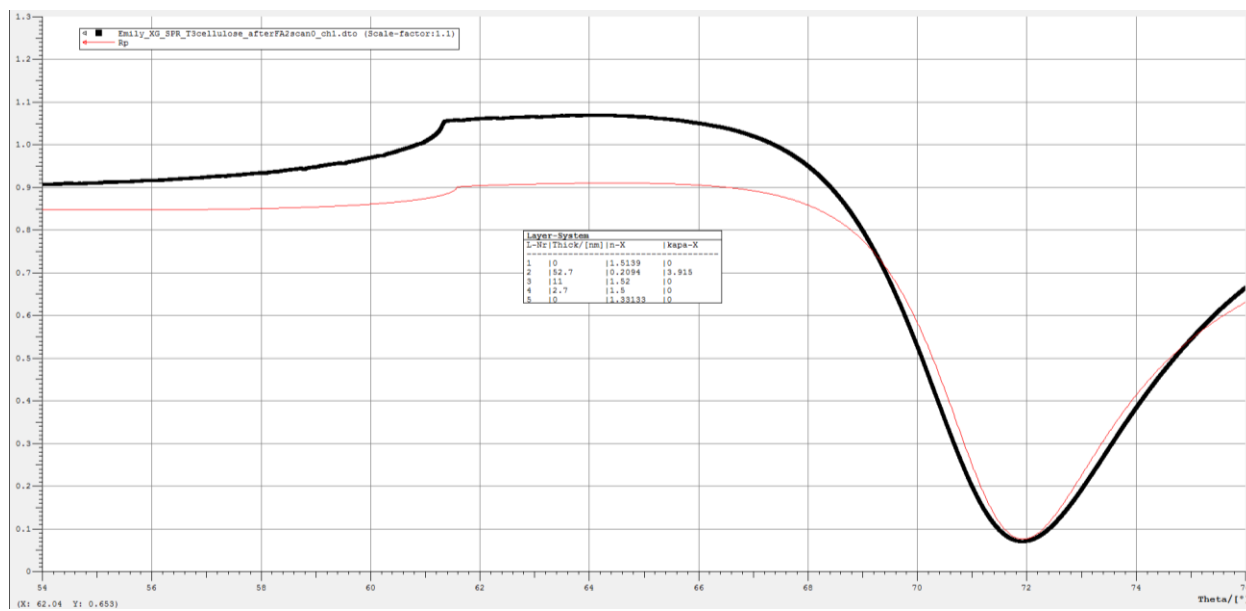

**Figure S6.** Fit for SPR curve of XG Adsorption on NMMO-Regenerated Cellulose in Water at 40°C. Black is experimental data and red is simulated curve. Iterative fitting routine converges at 0.01% leading to peak angle matching to the third decimal place.

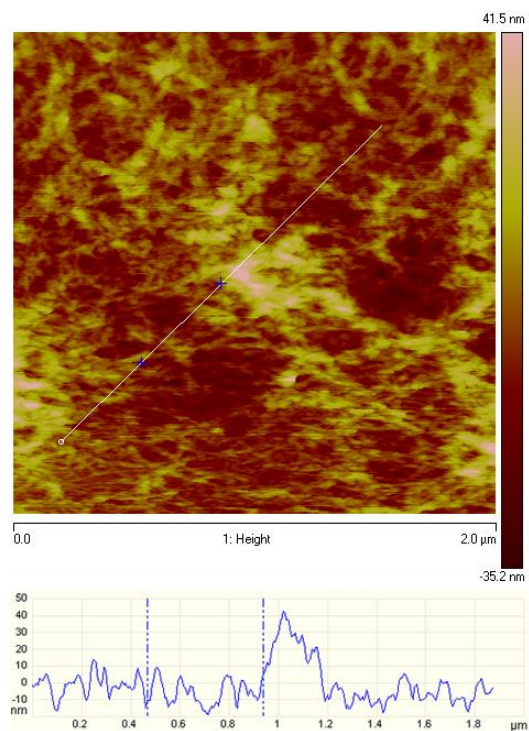

**Figure S7.** Tapping mode AFM image ( $2\ \mu\text{m} \times 2\ \mu\text{m}$ ) of a thin film of cellulose regenerated from NMMO on a gold SPR sensor.

**Table S1.** Refractive Indices<sup>§</sup> used to Fit SPR Data.

| Layer description        | Layer # | d (nm)                   | n                   | imaginary n |
|--------------------------|---------|--------------------------|---------------------|-------------|
| Prism and glass slide    | 1       | Infinite (0 in software) | 1.5139              | 0           |
| Au and Cr layer          | 2       | FP=48-56 nm              | FP=0.17-0.21        | FP=3.7-4.0  |
| Cellulose                | 3       | FP=0-20 nm               | 1.52                | 0           |
| XG                       | 4       | FP=0-10 nm               | 1.50                | 0           |
| Media (H <sub>2</sub> O) | 5       | Infinite (0 in software) | 1.33168-<br>1.33133 | 0           |

FP=fitting parameter, <sup>§</sup> assumed to be temperature independent in the range studied, d= thickness

**Table S2.** Layer Parameter Fits for XG Adsorption on NMMO-Regenerated Cellulose in Water at Various Temperatures.

|                   | T=24°C    |              |             | T=32°C    |            |             | T=40°C      |              |             |
|-------------------|-----------|--------------|-------------|-----------|------------|-------------|-------------|--------------|-------------|
|                   | d (nm)    | n            | Imaginary n | d (nm)    | n          | Imaginary n | d (nm)      | n            | Imaginary n |
| Prism/glass slide | 0(0)      | 1.5139(0)    | 0(0)        | 0(0)      | 1.5139(0)  | 0(0)        | 0(0)        | 1.5139(0)    | 0(0)        |
| Au and Cr layer   | 50(1)     | 0.205(0.007) | 3.94(0.02)  | 52.8(0)   | 0.2024(0)  | 3.94(0.02)  | 53.1(0.6)   | 0.204(0.007) | 3.92(0.01)  |
| Cellulose         | 12.8(0.3) | 1.52(0)      | 0(0)        | 12.8(0.1) | 1.52(0)    | 0(0)        | 11.05(0.07) | 1.52(0)      | 0(0)        |
| XG                | 1.4(0)    | 1.5(0)       | 0(0)        | 2.05(0.6) | 1.5(0)     | 0(0)        | 2.6(0.1)    | 1.5(0)       | 0(0)        |
| Media             | 0(0)      | 1.33168(0)   | 0(0)        | 0(0)      | 1.33151(0) | 0(0)        | 0(0)        | 1.33133(0)   | 0(0)        |

d = thickness. Average values are shown with standard deviation of the two measurements in brackets.
